# Supplementary material for: Readability of Online Patient Educational Materials for Coronary Artery Calcium Scans and Implications for Health Disparities
Source: PubMed Central journal article supplement — J Am Heart Assoc. 2020 Aug 31;9(18):e017372. doi: 10.1161/JAHA.120.017372 (PMC7726991; doi:10.1161/jaha.120.017372), 2020-08-31
Supplement: JAH3-9-e017372-s001.pdf [file JAH3-9-e017372-s001.pdf]

# **SUPPLEMENTAL MATERIAL**

**Table S1. Complete list of all unique OPEMs (as abbreviated in Figure 1 and Figures S1 and S2) with associated website titles, average grade-level readability scores, and lower and upper 95% confidence intervals.**

| <b>Abbreviated OPEM Title</b>                | <b>Full OPEM Title</b>                                                                                            | <b>Average Readability Score</b> | <b>95% CI</b> |
|----------------------------------------------|-------------------------------------------------------------------------------------------------------------------|----------------------------------|---------------|
| AMITA Health 1                               | AMITA Health: Calcium Score                                                                                       | 11.1                             | 9.8-12.4      |
| AMITA Health 2                               | AMITA Health: Keeping You Well                                                                                    | 13.8                             | 12.2-15.4     |
| Allina Health                                | Allina Health: Calcium Scoring Heart Scan                                                                         | 9.1                              | 7.5-10.8      |
| American College of Cardiology 1             | American College of Cardiology: Coronary Artery Calcium: Score? or No More?                                       | 14.7                             | 13.5-15.9     |
| American College of Cardiology 2             | American College of Cardiology: Coronary Calcium Score and Cardiovascular Risk                                    | 15.0                             | 13.9-16.2     |
| American Heart Association                   | American Heart Association: Coronary Calcium Test Could Help Clarify Heart Disease Risk - and Control Cholesterol | 13.8                             | 12.6-15.0     |
| Arkansas Heart Hospital                      | Arkansas Heart Hospital: Heartsaver CT                                                                            | 9.5                              | 8.2-10.9      |
| Ascension                                    | Ascension: Understanding Coronary Calcium Scan                                                                    | 8.2                              | 6.5-9.8       |
| Aurora Health Care                           | Aurora Health Care: Check for Signs of Heart Disease                                                              | 7.3                              | 5.8-8.8       |
| Beaumont Health                              | Beaumont: Calcium Scoring                                                                                         | 10.1                             | 8.8-11.3      |
| Bluegrass Regional Imaging                   | Bluegrass Regional Imaging: Coronary Artery Calcium Score                                                         | 9.2                              | 7.6-10.8      |
| CHI Health                                   | CHI Health: Do You Know Your Calcium Score? Here's Why You Should                                                 | 10.1                             | 9.1-11.1      |
| CNN Health                                   | CNN Health: Coronary Calcium Screening Better Predicts Heart Disease Risk, Research Finds                         | 12.9                             | 12.2-13.6     |
| Cabell Huntington Hospital                   | Cabell Huntington Hospital: Cardiac CT Calcium Scoring                                                            | 9.9                              | 8.7-11.1      |
| CardioSmart - American College of Cardiology | CardioSmart – American College of Cardiology: Understanding Coronary Artery Calcium (CAC) Scoring                 | 8.7                              | 7.4-10.0      |
| Cardiology Advisor                           | Cardiology Advisor: Coronary Artery Calcium Score Reliably Risk Stratifies Adults with Hypertension               | 16.1                             | 15.3-16.9     |
| Cardiovascular Business                      | Cardiovascular Business: Coronary Artery Calcium Scanning Is Not a Magic 8 Ball                                   | 15.3                             | 14.1-16.6     |
| Cedars-Sinai (for patients) 1                | Cedars-Sinai: Give a Heart Screening to Someone You Love                                                          | 10.5                             | 9.0-11.9      |

|                                                                |                                                                                                                                  |      |           |
|----------------------------------------------------------------|----------------------------------------------------------------------------------------------------------------------------------|------|-----------|
| Cedars-Sinai (for patients) 2                                  | Cedars-Sinai: CT Coronary Calcium Scan Procedure Information                                                                     | 10.9 | 9.8-12.1  |
| Cedars-Sinai - Women's Heart Center                            | Cedars-Sinai – Women’s Heart Center: Coronary Calcium Scan                                                                       | 10.0 | 8.8-11.1  |
| Central Minnesota Hospital: CentraCare Heart & Vascular Center | CentraCare Heart & Vascular Center: Know Your Heart                                                                              | 7.9  | 6.5-9.3   |
| Centura Health                                                 | Centura Health: Heart Scan & CT Calcium Scoring                                                                                  | 9.3  | 7.9-10.7  |
| Cleveland Clinic                                               | Cleveland Clinic: Calcium-Score Screening Heart Scan: Test Details                                                               | 11.6 | 10.1-13.1 |
| Columbus Regional Health                                       | Columbus Regional Health: Heart Scan for \$49                                                                                    | 7.7  | 6.2-9.1   |
| Dallas Medical Center                                          | Dallas Medical Center: Cardiac Calcium Score                                                                                     | 8.0  | 6.6-9.5   |
| Deaconess                                                      | Deaconess: Schedule a Heart Scan                                                                                                 | 8.4  | 7.0-9.8   |
| Diagnostic and Interventional Cardiology                       | Diagnostic and Interventional Cardiology: How the Agatston Calcium Score Was Created and its Impact on Heart Attack Prevention   | 13.1 | 11.5-14.7 |
| Ditch the Carbs                                                | Ditch the Carbs: Low-Carb Lesson – What is a Calcium Score?                                                                      | 9.3  | 8.1-10.6  |
| Doc's Opinion                                                  | Doc’s Opinion: Coronary Calcium Score                                                                                            | 13.9 | 12.8-15.1 |
| Drugs.com                                                      | Drugs.com: Heart Scan (Coronary Calcium Scan)                                                                                    | 9.7  | 8.3-11.0  |
| Emory Healthcare                                               | Emory Healthcare: Heart CT Screening for Coronary Artery Calcification (CT Calcium Score)                                        | 13.6 | 12.6-14.6 |
| Everyday Health                                                | Everyday Health: What is a Heart Scan?                                                                                           | 10.6 | 9.4-11.8  |
| Fairfax Radiological Consultants                               | Fairfax Radiological Consultants: Calcium Score                                                                                  | 10.1 | 8.9-11.3  |
| HSHS St. Mary's Hospital                                       | HSHS St. Mary’s Hospital: Heart Scan                                                                                             | 8.6  | 6.9-10.2  |
| Hancock Regional Hospital                                      | Hancock Regional Hospital: Cardiovascular Services                                                                               | 10.5 | 9.3-11.7  |
| Harvard Health Publishing 1                                    | Harvard Health Publishing: Should You Consider a Coronary Artery Calcium Scan?                                                   | 11.9 | 11.0-12.8 |
| Harvard Health Publishing 2                                    | Harvard Health Publishing: High Calcium Score: What’s Next?                                                                      | 11.4 | 10.0-12.8 |
| Harvard Health Publishing: Harvard Women's Health Watch        | Harvard Health Publishing – Harvard Women’s Health Watch: By the Way, Doctor: What Can I Do About a High Coronary Calcium Score? | 13.0 | 12.0-14.0 |
| Health Imaging                                                 | Health Imaging: EBT Heart Scan Can Predict Mortality                                                                             | 18.0 | 16.1-19.8 |
| Health Scan - Medical Imaging of Fredericksburg                | Health Scan – Medical Imaging of Fredericksburg: Cardiac Score – The Numbers Count for Your Health                               | 12.8 | 11.0-14.6 |

|                                                   |                                                                                                      |      |           |
|---------------------------------------------------|------------------------------------------------------------------------------------------------------|------|-----------|
| HealthNewsReview.org                              | HealthNewsReview.org: Coronary Calcium Scans: NYT Article Highlights Value and Minimizes Limitations | 12.4 | 11.2-13.6 |
| Healthline                                        | Healthline: Heart CT Scan                                                                            | 9.0  | 7.8-10.2  |
| Heart Center at St. Mark's                        | Heart Center at St. Mark's: 15 Minutes and \$69 Could Save Your Life                                 | 9.9  | 8.6-11.1  |
| HeartScan                                         | HeartScan: Welcome to the Bay Area Body and HeartScan, the Only EBT in Northern California           | 12.9 | 12.2-13.5 |
| Hendricks Regional Health                         | Hendricks Regional Health: Request a \$49 Heart Scan                                                 | 7.8  | 6.7-8.8   |
| Henry Ford Health System                          | Henry Ford Health System: Heart CT Scan                                                              | 7.9  | 6.6-9.2   |
| Holston Medical Group                             | Holston Medical Group: When a Heart Scan Saves Your Life                                             | 7.8  | 6.4-9.2   |
| Houston Medical Imaging                           | Houston Medical Imaging: Heart Scan                                                                  | 8.9  | 7.4-10.4  |
| Houston Methodist                                 | Houston Methodist: Heart Scan Packages                                                               | 11.6 | 10.6-12.6 |
| InsideRadiology                                   | InsideRadiology: Coronary Artery Calcium Scoring                                                     | 10.6 | 9.1-12.0  |
| Integrus                                          | Integrus: What You Should Know About Heart Scans                                                     | 12.0 | 11.0-13.0 |
| Intermountain Healthcare                          | Intermountain Healthcare: Calcium Score                                                              | 9.9  | 8.2-11.5  |
| Johns Hopkins Medicine                            | John Hopkins Medicine: The Heart Test You May Need – but Likely Haven't Heard Of                     | 11.2 | 10.1-12.3 |
| Kaiser Permanente - Healthwise                    | Kaiser Permanente: Coronary Calcium Scan                                                             | 7.6  | 6.2-9.0   |
| Lutheran Health Network - Dukes Memorial Hospital | Lutheran Health Network – Dukes Memorial Hospital: Heart Scan                                        | 11.9 | 10.7-13.1 |
| Main Line Health                                  | Main Line Health: Coronary Calcium Score                                                             | 9.9  | 8.7-11.1  |
| Mayo Clinic                                       | Mayo Clinic: Heart Scan (Coronary Calcium Scan)                                                      | 9.6  | 8.4-10.9  |
| Medical Xpress                                    | Medical Xpress: Do I Need a Heart Scan?                                                              | 10.3 | 8.9-11.6  |
| MedlinePlus Medical Encyclopedia                  | MedlinePlus Medical Encyclopedia: Heart CT Scan                                                      | 8.3  | 6.8-9.8   |
| Mercy                                             | Mercy: Coronary Calcium Scan                                                                         | 9.2  | 7.9-10.5  |
| Mount Elizabeth Novena Hospital - Health Plus     | Mount Elizabeth Novena Hospital – Health Plus: 5 Common Scans to Check Your Heart                    | 10.3 | 9.2-11.5  |
| Multi-Ethnic Study of Atherosclerosis (MESA)      | Multi-Ethnic Study of Atherosclerosis: CAC Score Reference Values                                    | 13.9 | 12.6-15.2 |
| NIH - National Heart, Lung, and Blood Institute 1 | NIH – National Heart, Lung, and Blood Institute: Coronary Calcium Scan                               | 9.5  | 7.8-11.1  |

|                                                      |                                                                                                                                                     |      |           |
|------------------------------------------------------|-----------------------------------------------------------------------------------------------------------------------------------------------------|------|-----------|
| NIH - National Heart, Lung, and Blood Institute 2    | NIH – National Heart, Lung, and Blood Institute: Nuclear Heart Scan                                                                                 | 9.1  | 8.1-10.0  |
| National Jewish Health                               | National Jewish Health: Coronary Artery Calcium Scoring CT Scan                                                                                     | 8.7  | 7.3-10.1  |
| National Lipid Association                           | National Lipid Association: Coronary Artery Calcium Testing                                                                                         | 11.8 | 10.3-13.2 |
| Northwestern Medicine                                | Northwestern Medicine: Nuclear Heart Scan                                                                                                           | 12.0 | 11.0-13.1 |
| Orlando Health                                       | Orlando Health: Heart Scan                                                                                                                          | 9.0  | 7.7-10.3  |
| Overland Park Regional Medical Center                | Overland Park Regional Medical Center: Coronary Calcium Scan                                                                                        | 9.9  | 8.5-11.2  |
| Penn Medicine - Lancaster General Health             | Penn Medicine – Lancaster General Health: Coronary Calcium Scan                                                                                     | 7.6  | 6.3-9.0   |
| Peter Attia, MD                                      | Peter Attia, MD – Coronary Artery Calcium Scan                                                                                                      | 12.8 | 11.7-13.9 |
| Radiology and Imaging Specialists                    | Radiology and Imaging Specialists: Heart Scan                                                                                                       | 14.1 | 13.1-15.1 |
| RadiologyInfo.org                                    | RadiologyInfo.org: Cardiac CT for Calcium Scoring                                                                                                   | 11.0 | 9.7-12.4  |
| Riverside Healthcare                                 | Riverside Healthcare: Heart Screening & Diagnosis                                                                                                   | 9.5  | 8.3-10.8  |
| Society of Cardiovascular Computed Tomography (SCCT) | Society of Cardiovascular Computed Tomography (SCCT): New Guideline Recommends CAC Scoring When There is Uncertainty Regarding Benefit from Statins | 15.1 | 13.9-16.4 |
| Swedish Medical Center                               | Swedish Medical Center: Coronary Calcium Scan                                                                                                       | 11.6 | 10.2-12.9 |
| Texas Heart Institute                                | Texas Heart Institute: Do I Need a Coronary Calcium Score?                                                                                          | 10.3 | 8.9-11.7  |
| The New York Times                                   | The New York Times: One More Heart Test to Consider: A Calcium Scan                                                                                 | 15.5 | 13.6-17.4 |
| The Washington Post                                  | The Washington Post: I Thought My Heart Attack Risk was Low. A Coronary Calcium Scan Told Me Otherwise                                              | 11.5 | 10.4-12.7 |
| Tidelands Health                                     | Tidelands Health: Heart Scan                                                                                                                        | 8.7  | 7.4-9.9   |
| UCI Health                                           | UCI Health: Coronary Calcium Scan                                                                                                                   | 10.5 | 9.2-11.7  |
| US News - Health                                     | US News – Health: CT Heart Scan Risks: 7 Better Ways to Screen for Heart Disease                                                                    | 14.3 | 12.8-15.7 |
| UT Southwestern Medical Center                       | UT Southwestern Medical Center: Cardiac Calcium Scoring: Using Imaging Tests to Prevent Heart Disease                                               | 12.4 | 10.9-13.8 |
| UW Health                                            | UW Health: Coronary Calcium Scan: Should I Have This Test?                                                                                          | 8.3  | 7.0-9.6   |
| UnityPoint Health                                    | UnityPoint Health: Heart Scan & Calcium Scoring                                                                                                     | 9.3  | 8.0-10.7  |

|                                       |                                                                                       |      |           |
|---------------------------------------|---------------------------------------------------------------------------------------|------|-----------|
| University Hospitals                  | University Hospitals: Calcium Scoring Program                                         | 10.7 | 9.3-12.1  |
| University of Maryland Medical Center | University of Maryland Medical Center: Cardiac Calcium Scoring (Heart Scan)           | 9.5  | 8.2-10.7  |
| University of Michigan Medicine       | University of Michigan Medicine: Coronary Calcium Scan: Should I Have This Test?      | 8.4  | 7.2-9.7   |
| Verywell Health                       | Verywell Health: Learn If You Should Have a Coronary Calcium Scan                     | 12.6 | 11.4-13.8 |
| WSAW-TV Station                       | WSAW-TV Station: Heart to Heart: The Life Saving Heart Scan You May Not Know About    | 7.9  | 6.6-9.2   |
| WebMD                                 | WebMD: What is a Coronary Calcium Scan?                                               | 6.2  | 4.7-7.7   |
| Wellmark                              | Wellmark: Coronary Artery Calcium Scoring                                             | 17.2 | 16.0-18.4 |
| Wexner Medical Center                 | Wexner Medical Center: Coronary CT Calcium Scan – What is a Coronary CT Calcium Scan? | 12.5 | 10.8-14.2 |
| Wikipedia                             | Wikipedia: Coronary CT Calcium Scan                                                   | 15.3 | 13.6-16.9 |
| Wilmington Health                     | Wilmington Health: HeartScore (Cardiac Calcium Score)                                 | 11.0 | 9.9-12.2  |

**Figure S1. Average grade-level readability of the top 50 Online Patient Educational Materials (OPEMs) for the “heart scan” search term.**

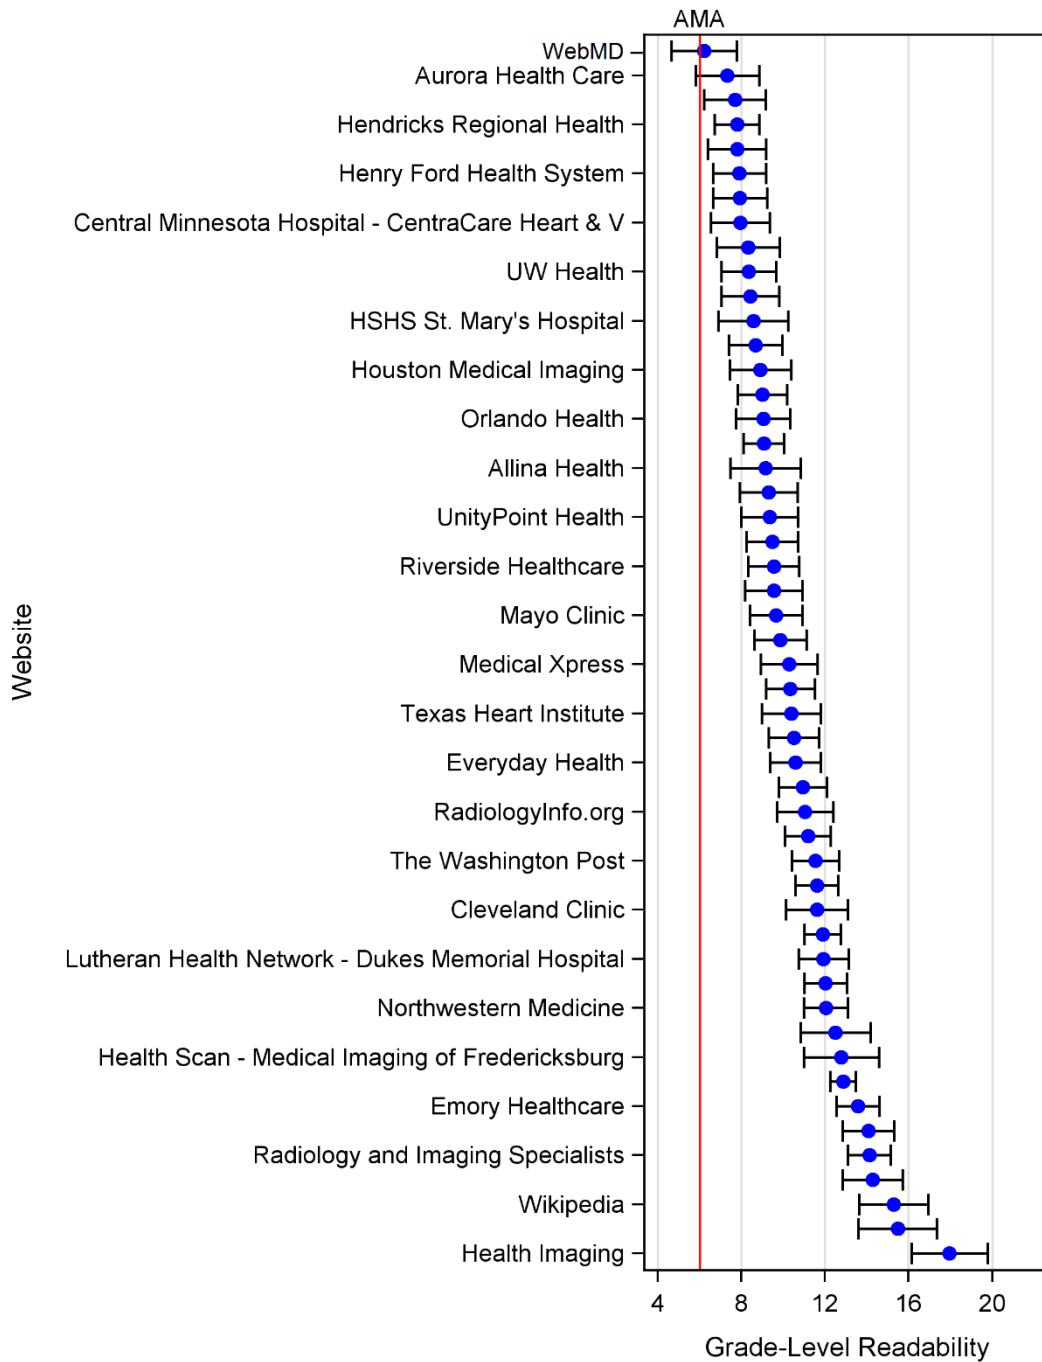

Point (blue) and interval (black) estimates display average grade-level readability with 95% confidence intervals of the 5 readability metrics for each unique OPEM. Full website titles are listed in Online Table 1. OPEMs are organized by increasing grade level.

**Figure S2. Average grade-level readability of the top 50 Online Patient Educational Materials (OPEMs) for the “CAC score” search term.**

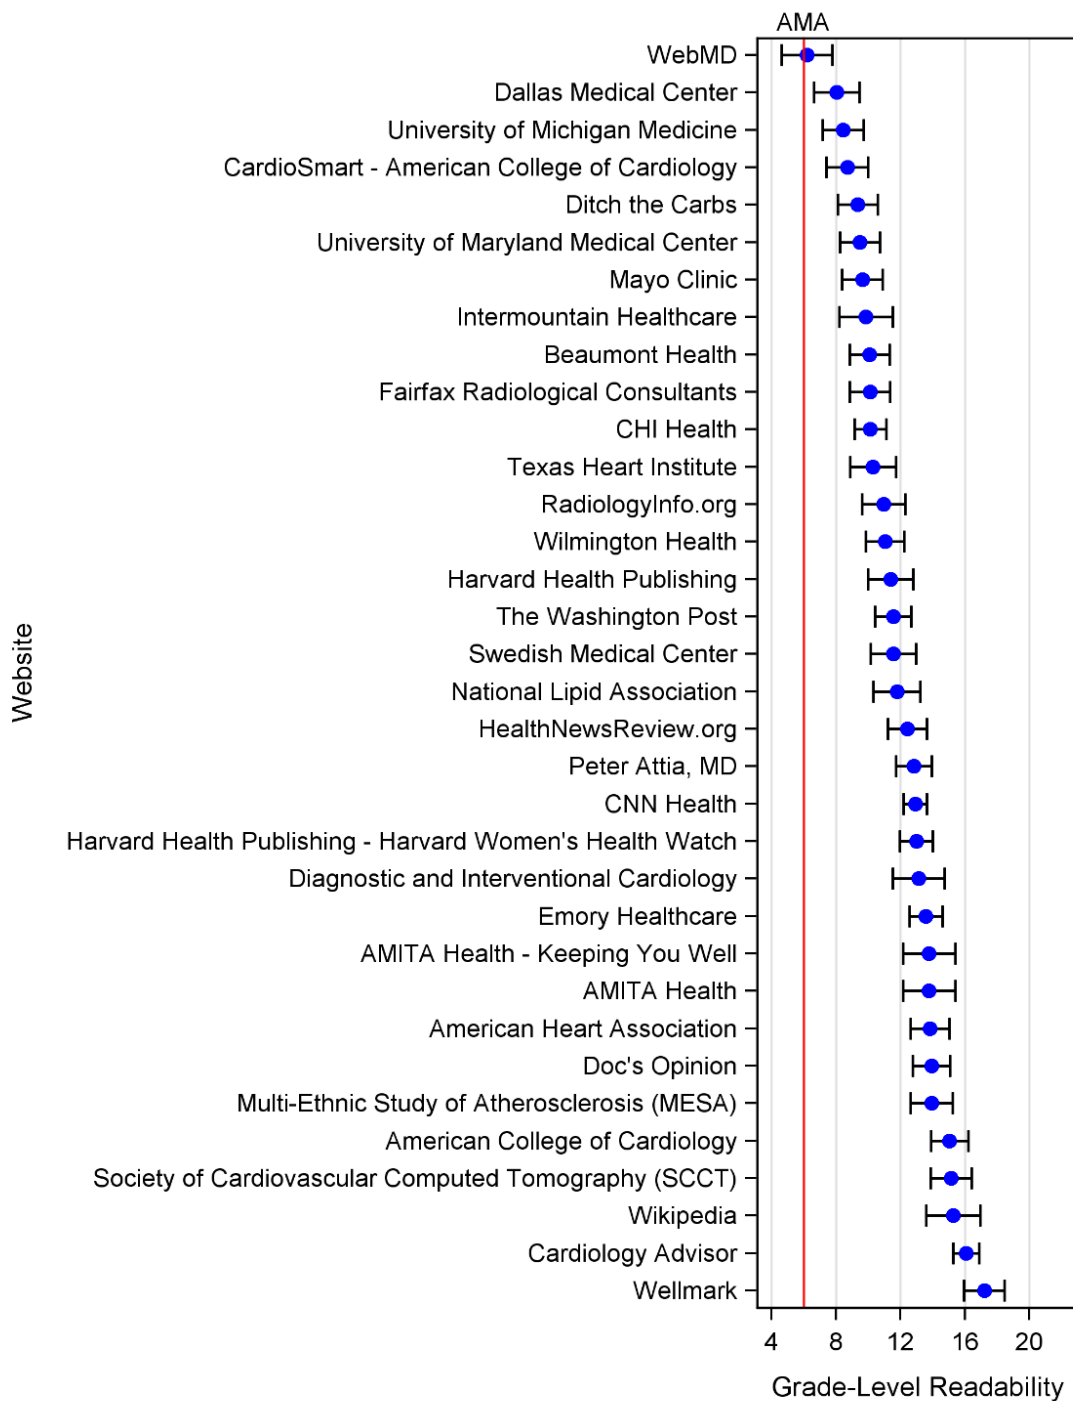

Point (blue) and interval (black) estimates display average grade-level readability with 95% confidence intervals of the 5 readability metrics for each unique OPEM. Full website titles are listed in Online Table 1. OPEMs are organized by increasing grade level.
